# Supplementary material for: Modifications of Chest CT Body Composition Parameters at Three and Six Months after Severe COVID-19 Pneumonia: A Retrospective Cohort Study
Source: MDPI journal article supplement (doi:10.3390/nu14183764), 2022-09-13
Supplement: s1 [file s1]

## Supplementary materials

### Supplementary Table S1

|                                    | Mean (SD)     |               |               |
|------------------------------------|---------------|---------------|---------------|
|                                    | T0            | T1            | T2            |
| <b>SAT – observed only (n=138)</b> | 159.8 (81.3)  | 156.3 (89.8)  | 161.1 (101.6) |
| <b>SAT – estimated only (n=65)</b> | 289.6 (130.7) | 297.3 (143.4) | 291.9 (140.9) |

Supplementary Table S1: Observed and visually estimated TAT and SAT at each time point.

### Supplementary Table S2

|                          | Baseline    |         | T1          |         |
|--------------------------|-------------|---------|-------------|---------|
|                          | coefficient | p-value | coefficient | p-value |
| <b>TAT – BMI (n=132)</b> | 0.70        | <0.0001 | 0.73        | <0.0001 |
| <b>SAT – BMI (n=132)</b> | 0.64        | <0.0001 | 0.68        | <0.0001 |
| <b>TAT – SAT (n=202)</b> | 0.97        | <0.0001 | 0.98        | <0.0001 |

Supplementary Table S2: Linear association coefficients at baseline and T1 (2-3 months after diagnosis) among BMI, body mass index, TAT, total adipose tissue area, and SAT, subcutaneous adipose tissue area.

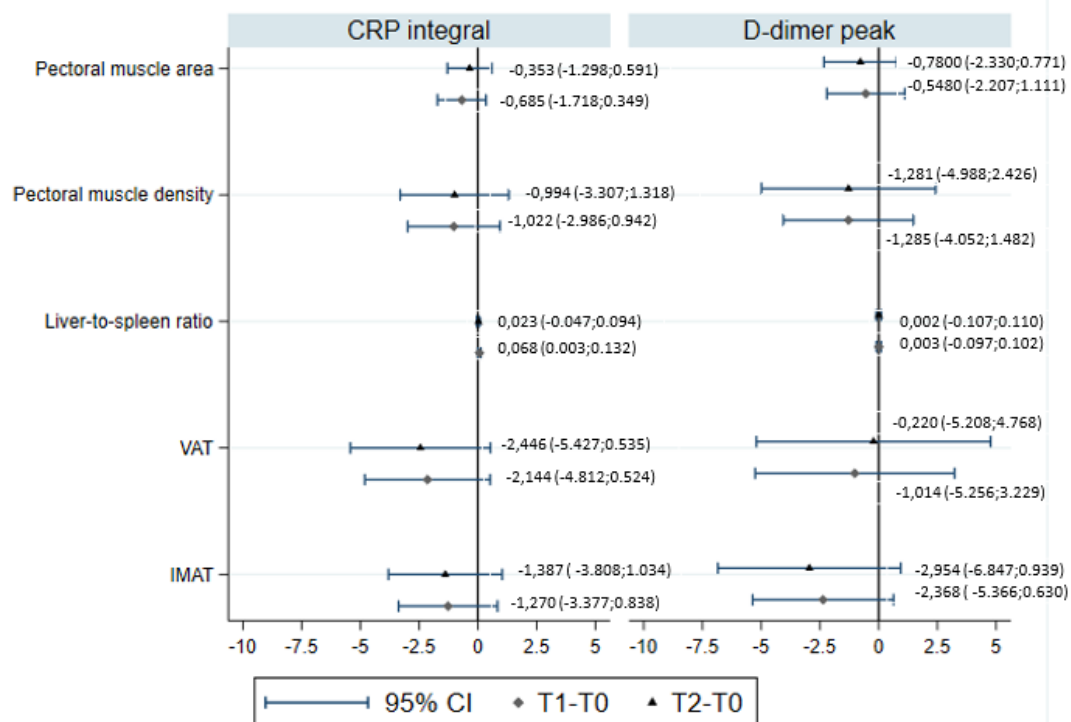

A

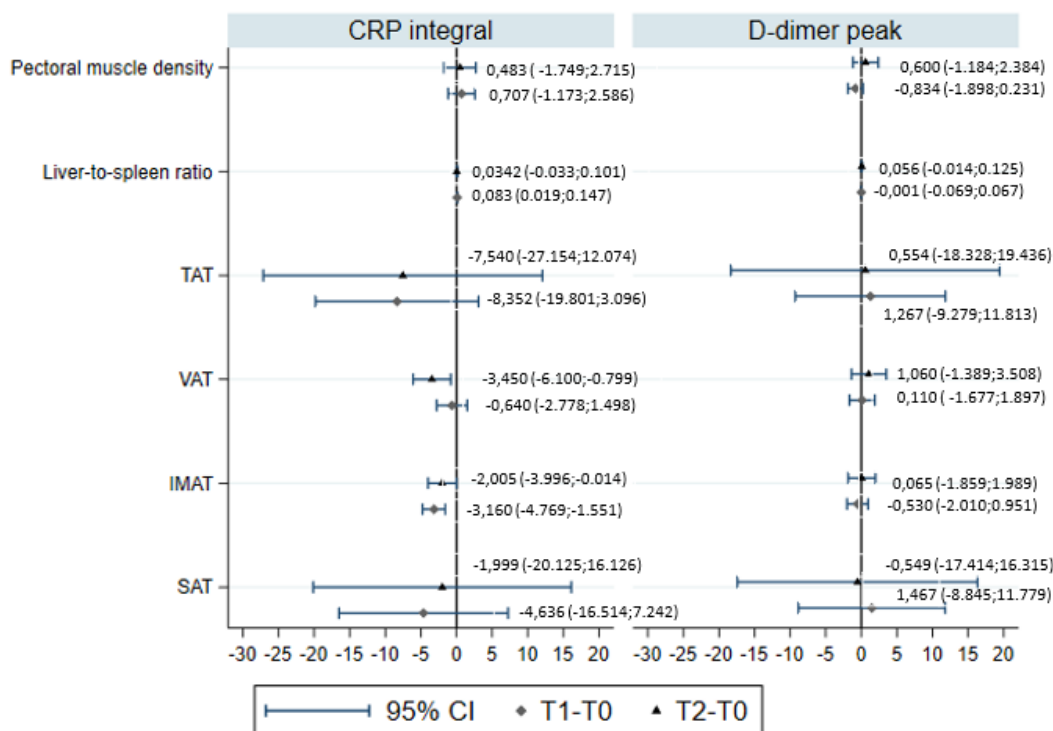

B

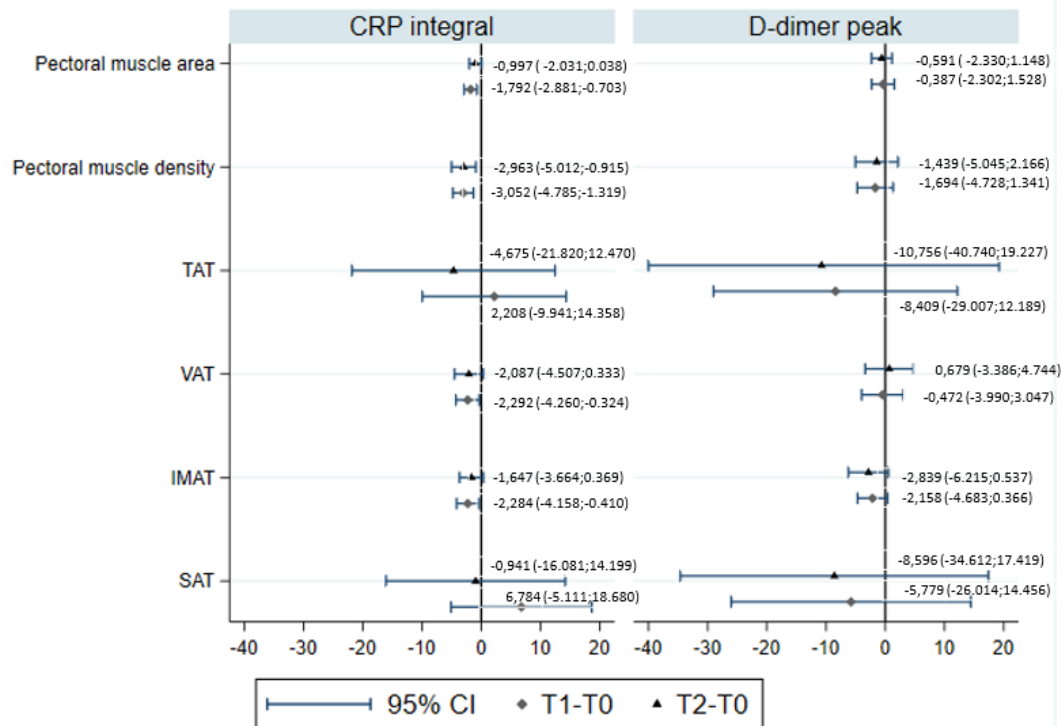

C

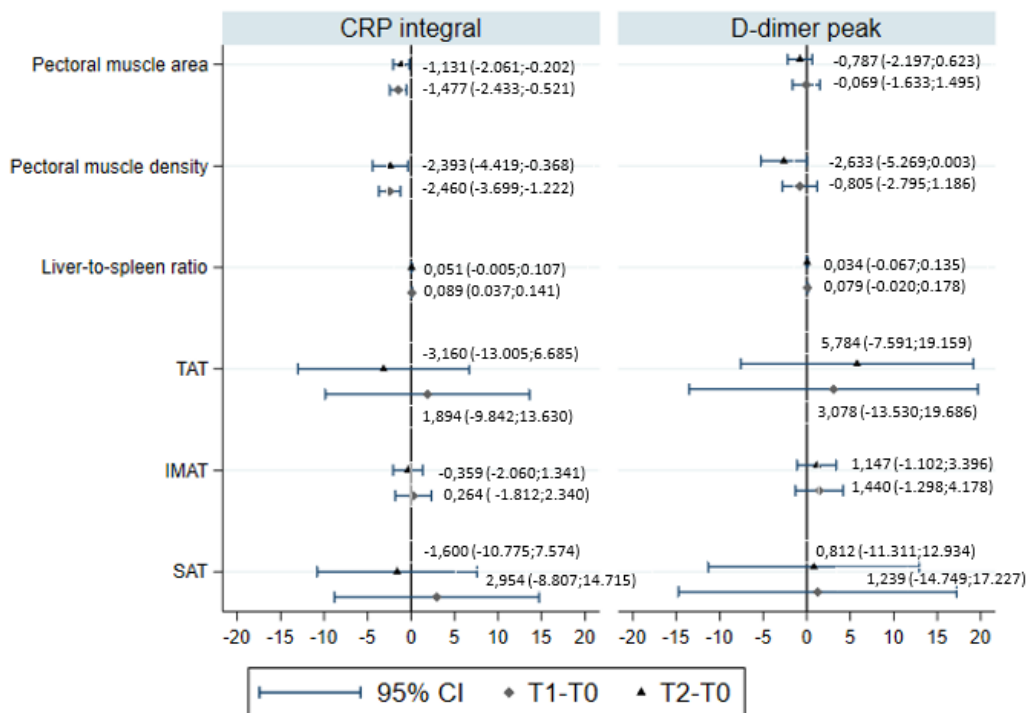

D

**Supplementary Figure S1:** Associations of CRP integral and D-dimer peak with CT body composition changes in models adjusted for age, sex, and baseline TAT, in different subgroups of patients: highest TAT tertile (A), lowest pectoral muscle area tertile (B), lowest liver-to-spleen ratio tertile (C), and highest VAT tertile (D).
